# Supplementary material for: Cα,Cortho-Dimetalated phosphazene complexes
Source: Royal Society of Chemistry journal article supplement (doi:10.1039/b707320h), 2007-01-01
Supplement: b707320h.pdf [file b707320h.pdf]

## Supporting information B707320H

### $C_{\alpha}$ , $C_{ortho}$ -Dimetalated Phosphazene Complexes

Jesús García López,<sup>a</sup> Ignacio Fernández,<sup>a</sup> Manuel Serrano Ruiz,<sup>b</sup> Fernando López Ortiz<sup>a,\*</sup>

<sup>a</sup>Área de Química Orgánica, Universidad de Almería, Carretera de Sacramento s/n, 04120, Almería, Spain.

<sup>b</sup>Área de Química Inorgánica, Universidad de Almería, Carretera de Sacramento s/n, 04120, Almería, Spain.

E-mail: flortiz@ual.es

### Table of contents

|                                                                                                                                                                                                       |     |
|-------------------------------------------------------------------------------------------------------------------------------------------------------------------------------------------------------|-----|
| -Synthetic procedures and NMR data of <b>6</b> , <b>7</b> , <b>8</b> , <b>9</b> and <b>10</b> .....                                                                                                   | S2  |
| - <b>Figure S1.</b> <sup>1</sup> H NMR spectra (500.13 MHz) of <b>6</b> in THF- <i>d</i> <sub>8</sub> measured at –90 °C .....                                                                        | S7  |
| - <b>Figure S2.</b> Expansion of the 1D gTOCSY of <b>6</b> in THF- <i>d</i> <sub>8</sub> measured at –90 °C .....                                                                                     | S7  |
| - <b>Figure S3.</b> 2D gCOSY45 spectrum (500.13 MHz) of <b>6</b> in THF- <i>d</i> <sub>8</sub> measured at –95 °C .....                                                                               | S8  |
| - <b>Figure S4.</b> Aromatic region of the <sup>13</sup> C NMR spectra (125.76 MHz) of <b>6</b><br>in THF- <i>d</i> <sub>8</sub> measured at –95 °C.....                                              | S9  |
| - <b>Figure S5.</b> Expansions of the C1 and C6 carbon signals (125.76 MHz) of <b>6</b> measured at –95 °C ..                                                                                         | S9  |
| - <b>Figure S6.</b> <sup>31</sup> P{ <sup>1</sup> H} NMR spectra (202.46 MHz) of <b>6</b> measured at –100 °C.....                                                                                    | S10 |
| - <b>Figure S7.</b> <sup>7</sup> Li{ <sup>1</sup> H} NMR spectra (194.37 MHz) of <b>6</b> measured at –100 °C.....                                                                                    | S10 |
| - <b>Figure S8.</b> 1D gROESY spectra (500.13 MHz) of <b>6</b> in THF- <i>d</i> <sub>8</sub> measured at –90 °C.....                                                                                  | S11 |
| - <b>Figure S9.</b> <sup>31</sup> P{ <sup>1</sup> H} NMR, <sup>119</sup> Sn, <sup>1</sup> H INEPT and <sup>199</sup> Hg{ <sup>1</sup> H} NMR spectra of <b>10</b> in THF- <i>d</i> <sub>8</sub> ..... | S11 |
| - <b>Figure S10.</b> 1D gNOESY spectra (500.13 MHz) of <b>10</b> in THF- <i>d</i> <sub>8</sub> , mixing time of 500 ms:<br>(A) and (C); (B) and (D) acquired with <sup>31</sup> P decoupling .....    | S12 |

**General.** All reactions and manipulations were carried out in a dry N<sub>2</sub> gas atmosphere using standard procedures. THF and THF-*d*<sub>8</sub> were distilled from sodium/benzophenone immediately prior to use. Commercial reagents were purchased from Acros. Thin-layer chromatography (TLC) was performed on aluminum-backed Merck plates coated with silica gel 60 F<sub>254</sub>. Silica gel 60 (40-63 μm) or activated alumina (neutral, 70-290 mesh) from Scharlau was used for column chromatography. Melting points are uncorrected. Mass spectra were determined by APCI technique. Phosphazene **3a** was prepared as described elsewhere.<sup>1</sup>

**NMR studies.** NMR experiments were conducted on two spectrometers working at proton frequencies of 300 MHz ( $B_0=7$  T) and 500 MHz ( $B_0=11.74$  T). Two 5-mm probe heads were used: a QNPZ probe (<sup>1</sup>H, <sup>13</sup>C, <sup>15</sup>N, <sup>31</sup>P) for  $B_0=7$  T, and a direct triple probe <sup>1</sup>H/<sup>31</sup>P, BB (<sup>31</sup>P-<sup>109</sup>Ag) for  $B_0=11.74$  T. Both probes included a z-gradient coil. The 500 MHz instrument was equipped with a third radio frequency channel. Frequencies, pulse widths for the 90° pulses and the attenuation levels applied are given in Table S1. The spectral references used were internal tetramethylsilane for <sup>1</sup>H and <sup>13</sup>C, external 85% H<sub>3</sub>PO<sub>4</sub> for <sup>31</sup>P, 1 M LiBr in D<sub>2</sub>O for <sup>7</sup>Li, Me<sub>4</sub>Sn (saturated solution in CDCl<sub>3</sub>) for <sup>119</sup>Sn, and Me<sub>2</sub>Hg (neat liq.;  $\mathcal{E}=17.910822$  MHz) for <sup>199</sup>Hg. A set of two complementary <sup>31</sup>P/<sup>7</sup>Li-selective band pass/stop frequency filters was used for the measurement of NMR spectra involving <sup>31</sup>P and <sup>7</sup>Li nuclei.

**Table S1.** Pulse widths for 90° pulses (μs) and attenuation levels (dB, in brackets) used.

| Field (Tesla) | <sup>1</sup> H | <sup>1</sup> H-dec | <sup>7</sup> Li | <sup>7</sup> Li-dec | <sup>13</sup> C | <sup>31</sup> P | <sup>31</sup> P-dec | <sup>119</sup> Sn | <sup>199</sup> Hg |
|---------------|----------------|--------------------|-----------------|---------------------|-----------------|-----------------|---------------------|-------------------|-------------------|
| 7.05          | 8.8 (-2)       | 95 (20)            | -               | -                   | 8.0 (-3)        | 9.7 (-6)        | -                   | -                 | -                 |
| Freq (MHz)    | 300.13         | 300.13             |                 |                     | 75.47           | 121.49          |                     |                   |                   |
| 11.74         | 9.2 (-4)       | 85 (15)            | 15.7 (0)        | 88 (15)             | 7.5 (0)         | 31 (0)          | 100 (8.4)           | 28 (-2)           | 7.5 (0)           |
| Freq (MHz)    | 500.13         | 500.13             | 194.37          | 194.37              | 125.72          | 202.46          | 202.46              | (186.5)           | (89.58)           |

NMR samples of **6** were prepared according to the following protocol: to a solution of 26 mg (91 μmol) of **3a** in dry THF-*d*<sub>8</sub> (0.3 mL) prepared in a dried 5-mm NMR tube at -70 °C were added 132 μL (0.199 mmol) of *s*BuLi (1.3 M solution in *n*-hexane). The sample was transferred to the magnet with the probehead previously cooled to -90 °C. The extra signals shown in the spectra correspond to the solvent of the organolithium base, which was not eliminated. This procedure reproduces faithfully the same reaction conditions used in bulk. The NMR spectra of neutral compounds were measured in CDCl<sub>3</sub> solutions. Unless otherwise stated, standard Bruker software routines were used for the 1D and 2D NMR measurements.

Selected spectral parameters were as follows: <sup>7</sup>Li NMR (194.32 MHz): 16 *K* data points; spectral width 1400 Hz; exponential multiplication with a line broadening factor of 1 Hz. <sup>31</sup>P NMR (202.4 MHz): 32 *K*

<sup>1</sup> J. M. Álvarez-Gutiérrez, E. Peralta-Pérez, I. Pérez-Álvarez and F. López-Ortiz, *Tetrahedron*, 2001, **57**, 3075.

data points; spectral width 6000 Hz; exponential multiplication with a line broadening factor of 1 Hz. Resolution enhancement processing parameters are given at the caption of the appropriated figure. The assignment of the proton signals was based on the analysis of chemical shifts and the multiplicity patterns in the  $^1\text{H}$  NMR spectra. For compound **6** the assignment was completed through the correlations observed in a 2D COSY45 spectrum acquired at  $-90\text{ }^\circ\text{C}$ . The assignment of the carbon signals was deduced from the correlations observed in the HMQC spectrum measured at  $-90\text{ }^\circ\text{C}$  and the magnitude of the chemical shifts.

Numbering scheme for **6**:

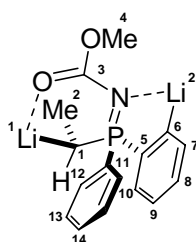

**NMR data for 6 in THF- $d_8$ :**  $^1\text{H}$  NMR (500.13 MHz,  $-90\text{ }^\circ\text{C}$ )  $\delta$  0.4 (bs, H1), 1.34 (dd, H2,  $J_{\text{PH}} = 20.5$ ,  $J_{\text{HH}} = 8.2$  Hz), 3.55 (s, H4), 6.70 (bt, H8,  $J_{\text{PH}} = 2.0$ ,  $J_{\text{HH}} = 6.8$  Hz), 6.72 (q, H9,  $J_{\text{PH}} = J_{\text{HH}} = 6.8$  Hz), 7.24 (m, H13), 7.25 (m, H14), 7.4 (dd, H10,  $J_{\text{PH}} = 10.9$ ,  $J_{\text{HH}} = 6.8$  Hz), 7.69 (m, H12), 7.95 (d, H7,  $J_{\text{HH}} = 6.8$  Hz).  $^{13}\text{C}$  NMR (125.76 MHz,  $-95\text{ }^\circ\text{C}$ )  $\delta$  1.83 (dq, C1,  $J_{\text{PC}} = 51.9$ ,  $J_{\text{CLi}} = 17.0$  Hz), 11.58 (C2), 51.45 (C4), 121.3 (d, C9,  $J_{\text{PC}} = 16.0$  Hz), 124.5 (C8), 127.62 (C10), 127.79 (d, C13,  $J_{\text{PC}} = 9.0$  Hz), 128.87 (d, C14,  $J_{\text{PC}} = 3.1$  Hz), 131.0 (d, C12,  $J_{\text{PC}} = 7.5$  Hz), 140.06 (d, C11,  $J_{\text{PC}} = 81.8$  Hz), 142.28 (d, C7,  $J_{\text{PC}} = 24.9$  Hz), 145.44 (d, C5,  $J_{\text{PC}} = 110.7$  Hz), 165.08 (C3), 209.27 (m, C6,  $J_{\text{CLi}} = 30.3$  Hz).  $^{31}\text{P}$  NMR (202.46,  $-100\text{ }^\circ\text{C}$ )  $\delta$  43.81.  $^7\text{Li}$  NMR (194.37 MHz,  $-100\text{ }^\circ\text{C}$ )  $\delta$  1.2 (d, Li2,  $J_{\text{PLi}} = 3.2$  Hz), 2.3 (d, Li1,  $J_{\text{PLi}} = 7.1$  Hz). Key: bs: broad singlet, bt: broad triplet, m: multiplet.

### Synthesis of the tin(IV) complexes **7**, **8**, and **9**.

To a solution of **3a** ( $6.64 \times 10^{-4}$  mol) in THF (15 mL) was added a solution of *t*BuLi (0.86 mL of a 1.7 M solution in cyclohexane,  $1.46 \times 10^{-3}$  mol) at  $-70\text{ }^\circ\text{C}$ . After 30 min of metalation was added chlorotrimethyltin ( $1.33 \times 10^{-3}$  mol). The reaction mixture was stirred at  $-95\text{ }^\circ\text{C}$  for 15 h and then quenched with water. After aqueous workup, the organic layers were dried over  $\text{Na}_2\text{SO}_4$  and concentrated in vacuo.  $^1\text{H}$ ,  $^1\text{H}\{^{31}\text{P}\}$ , and  $^{31}\text{P}$  NMR spectra of the crude reaction were measured in order to determine the distribution of products. The crude mixture was purified by flash column chromatography (eluent: ethyl acetate:hexane, ratio of 1:4) affording the compounds **7**, **8**, and **9** (order of elution). Yields after chromatography were 63% for **7** (white solid,  $93.8\text{ }^\circ\text{C}$ ), 3% for **8** (yellow oil), and 10% for **9** (white solid,  $132.5\text{ }^\circ\text{C}$ ).

Numbering scheme for **7**:

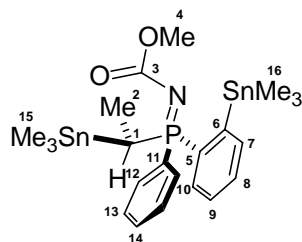

**NMR data for 7 in CDCl<sub>3</sub>:** <sup>1</sup>H NMR (500.13 MHz, 25 °C) δ 0.05 (s, H15), 0.36 (s, H16), 1.33 (dd, H2,  $J_{\text{PH}}=18.7$ ,  $J_{\text{HH}}=7.4$  Hz), 2.46 (dq, H1,  $J_{\text{PH}}=13.7$ ,  $J_{\text{HH}}=7.4$  Hz), 3.62 (s, H4), 7.37 (ddt, H9,  $J_{\text{PH}}=3.4$ ,  $J_{\text{HH}}=7.6$  Hz,  $J_{\text{HH}}=1.4$  Hz), 7.48 (m, H8, H13 y H14), 7.56 (dddd, H10,  $J_{\text{PH}}=12.6$ ,  $J_{\text{HH}}=7.6$  Hz,  $J_{\text{HH}}=1.4$  Hz,  $J_{\text{HH}}=0.5$  Hz), 7.68 (m, H12), 7.89 (dddd, H7,  $J_{\text{PH}}=2.8$ ,  $J_{\text{HH}}=7.6$  Hz,  $J_{\text{HH}}=1.4$  Hz,  $J_{\text{HH}}=0.5$  Hz). <sup>13</sup>C NMR (125.76 MHz, 25 °C) δ -7.02 (d, C15,  $J_{\text{PC}}=1.4$  Hz), -3.08 (d, C16,  $J_{\text{PC}}=0.9$  Hz), 10.85 (d, C2,  $J_{\text{PC}}=4.3$  Hz), 13.28 (d, C1,  $J_{\text{PC}}=47.4$  Hz), 51.98 (d, C4,  $J_{\text{PC}}=3.4$  Hz), 127.97 (d, C9,  $J_{\text{PC}}=14.3$  Hz), 128.67 (d, C13,  $J_{\text{PC}}=11.3$  Hz), 130.27 (d, C8,  $J_{\text{PC}}=3.4$  Hz), 130.91 (d, C10,  $J_{\text{PC}}=18.2$  Hz), 131.26 (d, C12,  $J_{\text{PC}}=9.1$  Hz), 131.53 (d, C14,  $J_{\text{PC}}=2.8$  Hz), 131.55 (d, C11,  $J_{\text{PC}}=83.3$  Hz), 134.07 (d, C5,  $J_{\text{PC}}=117.6$  Hz), 137.55 (d, C7,  $J_{\text{PC}}=14.3$  Hz), 151.75 (d, C6,  $J_{\text{PC}}=11.1$  Hz), 162.32 (d, C3,  $J_{\text{PC}}=3.5$  Hz). <sup>31</sup>P NMR (202.46, 25 °C) δ 31.88,  $^2J_{\text{SnP}}=30.1$ ,  $^3J_{\text{SnP}}=11.1$  Hz. <sup>119</sup>Sn NMR (186.5, 25 °C) δ 7.59 (d,  $^2J_{\text{SnP}}=30.1$  Hz, SnC1), -72.91 (d,  $^3J_{\text{SnP}}=11.1$  Hz, SnC6). MS (APCI-ES) *m/z* 616 (M+1). Calcd (%) for C<sub>22</sub>H<sub>34</sub>NO<sub>2</sub>PSn<sub>2</sub>: C, 43.11; H, 5.59; N, 2.29. Found: C, 43.09; H, 5.63; N, 2.27.

Numbering scheme for **8**:

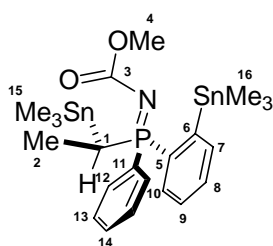

**NMR data for 8 in CDCl<sub>3</sub>:** <sup>1</sup>H NMR (300.13 MHz, 25 °C) δ 0.02 (s, H15), 0.30 (s, H16), 1.54 (dd, H2,  $J_{\text{PH}}=18.9$ ,  $J_{\text{HH}}=7.5$  Hz), 2.53 (dq, H1,  $J_{\text{PH}}=12.4$ ,  $J_{\text{HH}}=7.5$  Hz), 3.62 (s, H4), 7.43 (m, H8, H9, H13 and H14), 7.62 (ddd, H10,  $J_{\text{PH}}=11.8$ ,  $J_{\text{HH}}=7.6$  Hz,  $J_{\text{HH}}=1.5$  Hz), 7.70 (m, H12), 7.85 (ddd, H7,  $J_{\text{PH}}=2.7$ ,  $J_{\text{HH}}=7.6$  Hz,  $J_{\text{HH}}=1.4$  Hz,  $J_{\text{HH}}=0.5$  Hz). <sup>13</sup>C NMR (75.47 MHz, 25 °C) δ -8.62 (d, C15,  $J_{\text{PC}}=1.4$  Hz), -3.36 (C16), 11.72 (d, C2,  $J_{\text{PC}}=4.6$  Hz), 16.46 (d, C1,  $J_{\text{PC}}=48.1$  Hz), 52.0 (d, C4,  $J_{\text{PC}}=3.3$  Hz), 127.84 (d, C9,  $J_{\text{PC}}=13.6$  Hz), 128.59 (d, C13,  $J_{\text{PC}}=11.5$  Hz), 130.45 (d, C8,  $J_{\text{PC}}=3.0$  Hz), 130.55 (d, C11,  $J_{\text{PC}}=82.7$  Hz), 131.0 (d, C10,  $J_{\text{PC}}=16.5$  Hz), 131.23 (d, C14,  $J_{\text{PC}}=2.9$  Hz), 131.51 (d, C12,  $J_{\text{PC}}=9.5$  Hz), 134.18 (d,

C5,  $J_{\text{PC}} = 120.3$  Hz), 137.84 (d, C7,  $J_{\text{PC}} = 14.3$  Hz), 151.18 (d, C6,  $J_{\text{PC}} = 12.0$  Hz), 162.32 (d, C3,  $J_{\text{PC}} = 3.5$  Hz).  $^{31}\text{P}$  NMR (121.49, 25 °C)  $\delta$  31.15,  $^2J_{\text{SnP}} = 27.9$ ,  $^3J_{\text{SnP}} = 16.7$  Hz.  $^{119}\text{Sn}$  NMR (186.5, 25 °C)  $\delta$  18.6 (d,  $^2J_{\text{SnP}} = 27.9$  Hz,  $\text{SnC1}$ ), -69.24 (d,  $^3J_{\text{SnP}} = 16.7$  Hz,  $\text{SnC6}$ ). MS (APCI-ES)  $m/z$  616 (M+1). Calcd (%) for  $\text{C}_{22}\text{H}_{34}\text{NO}_2\text{PSn}_2$ : C, 43.11; H, 5.59; N, 2.29. Found: C, 43.13; H, 5.65; N, 2.31.

Numbering scheme for **9**:

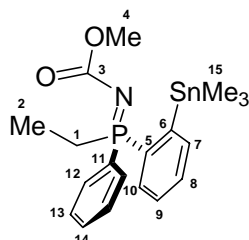

**NMR data for 9 in  $\text{CDCl}_3$ :**  $^1\text{H}$  NMR (500.13 MHz, 25 °C)  $\delta$  0.37 (s, H15), 1.05 (dt, H2,  $J_{\text{PH}} = 18.3$  Hz,  $J_{\text{HH}} = 7.5$  Hz), 2.41 (ddq, H1,  $J_{\text{PH}} = 8.4$  Hz,  $J_{\text{HH}} = 15$  Hz,  $J_{\text{HH}} = 7.5$  Hz), 3.18 (tq, H1,  $J_{\text{PH}} = J_{\text{HH}} = 15$  Hz,  $J_{\text{HH}} = 7.5$  Hz), 3.61 (s, H4), 7.38 (m, H9), 7.45 (m, H13), 7.51 (m, H), 7.69 (m, H12) y 7.92 (m, H-7).  $^{13}\text{C}$  NMR (125.76 MHz, 25 °C)  $\delta$  -3.33 (C15), 5.59 (d, C2,  $J_{\text{PC}} = 4.0$  Hz), 18.34 (d, C1,  $J_{\text{PC}} = 57.9$  Hz), 52.15 (d, C4,  $J_{\text{PC}} = 3.4$  Hz), 128.11 (d, C9,  $J_{\text{PC}} = 14.6$  Hz), 128.73 (d, C13,  $J_{\text{PC}} = 11.5$  Hz), 130.75 (d, C5,  $J_{\text{PC}} = 119.6$  Hz), 130.87 (d, C8,  $J_{\text{PC}} = 3.6$  Hz), 131.03 (d, C11,  $J_{\text{PC}} = 86.9$  Hz), 131.37 (d, C10,  $J_{\text{PC}} = 18.6$  Hz), 131.41 (d, C12,  $J_{\text{PC}} = 9.1$  Hz), 131.96 (d, C14,  $J_{\text{PC}} = 2.7$  Hz), 152.50 (d, C6,  $J_{\text{PC}} = 11.9$  Hz), 162.31 (d, C3,  $J_{\text{PC}} = 2.5$  Hz).  $^{31}\text{P}$  NMR (202.46, 25 °C)  $\delta$  27.93,  $^3J_{\text{SnP}} = 13.4$  Hz.  $^{119}\text{Sn}$  NMR (186.5, 25 °C)  $\delta$  -73.42 (d,  $^3J_{\text{SnP}} = 13.4$  Hz,  $\text{SnC6}$ ). MS (APCI-ES)  $m/z$  452 (M+1). Calcd (%) for  $\text{C}_{19}\text{H}_{26}\text{NO}_2\text{PSn}$ : C, 50.70; H, 5.82; N, 3.11. Found: C, 50.72; H, 5.79; N, 3.13.

### Synthesis of the Hg(II), tin(IV) complexes **10**, **11**, and Hg(II) complex **12**.

A solution of **3a** ( $6.64 \times 10^{-4}$  mol) in THF (15 mL) was treated with a solution of *t*BuLi (0.86 mL of a 1.7 M solution in cyclohexane,  $1.46 \times 10^{-3}$  mol) at -70 °C for 30 min. Chlorophenylmercury ( $6.64 \times 10^{-4}$  mol) was then introduced at -90 °C to the reaction mixture, which was stirred for 15 h. Subsequently, chlorotrimethyltin ( $6.64 \times 10^{-4}$  mol) was added at -90 °C and the reaction mixture was stirred for an additional period of 4 h. After aqueous workup, the organic layers were dried over  $\text{Na}_2\text{SO}_4$  and concentrated in vacuo.  $^1\text{H}$ ,  $^1\text{H}\{^{31}\text{P}\}$ , and  $^{31}\text{P}$  NMR spectra of the crude reaction were measured in order to determine the distribution of products. The crude mixture was purified by flash column chromatography (eluent: ethyl acetate:hexane, ratio of 1:5; adsorbent: alumina) affording the compounds **10**, **11**, and **12** (order of elution). Yields after chromatography were 40% for **10** (white oil), 8% for **11** (yellow oil), and 4% for **12** (white foam).

Numbering scheme for **10**:

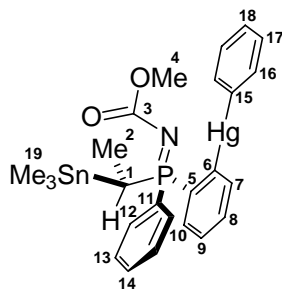

**NMR data for (2-((R\*)-N-(methoxycarbonyl)-P-phenyl-P-((R\*)-1-(trimethylstannyl)-ethyl)phosphorimidoyl)phenyl)-(phenyl)mercury 10 in THF-*d*<sub>8</sub>**: <sup>1</sup>H NMR (300.13 MHz, 25 °C) δ 0.01 (s, H19), 1.40 (dd, H2, *J*<sub>PH</sub>= 19, *J*<sub>HH</sub>= 7.5 Hz), 2.59 (dq, H1, *J*<sub>PH</sub>= 12.1, *J*<sub>HH</sub>= 7.5 Hz), 3.48 (s, H4), 7.14 (m, H18), 7.33 (m, H9 and H17), 7.47 (m, H8, H13 and H14), 7.65 (m, H16), 7.69 (m, H7) and 7.85 (m, H10 and H12). <sup>13</sup>C NMR (75.47 MHz, 25 °C) δ -7.61 (d, C19, *J*<sub>PC</sub>= 1.5 Hz), 9.81 (d, C2, *J*<sub>PC</sub>= 4.2 Hz), 13.04 (d, C1, *J*<sub>PC</sub>= 46.6 Hz), 50.92 (d, C4, *J*<sub>PC</sub>= 3.5 Hz), 126.53 (d, C9, *J*<sub>PC</sub>= 14.5 Hz), 126.54 (C18), 127.30 (C17), 128.51 (d, C13, *J*<sub>PC</sub>= 11.5 Hz), 129.84 (d, C8, *J*<sub>PC</sub>= 3.3 Hz), 131.45 (d, C10, *J*<sub>PC</sub>= 18.6 Hz), 130.95 (d, C12, *J*<sub>PC</sub>= 9.2 Hz), 131.30 (d, C14, *J*<sub>PC</sub>= 2.7 Hz), 132.35 (d, C11, *J*<sub>PC</sub>= 88.1 Hz), 135.76 (d, C5, *J*<sub>PC</sub>= 116.1 Hz), 138.49 (C16), 139.28 (d, C7, *J*<sub>PC</sub>= 14.2 Hz), 162.27 (d, C3, *J*<sub>PC</sub>= 4.6 Hz), 167.21 (d, C15, *J*<sub>PC</sub>= 4.8 Hz) and 177.28 (d, C6, *J*<sub>PC</sub>= 11.9 Hz). <sup>31</sup>P NMR (121.49, 25 °C) δ 35.34 (<sup>3</sup>*J*<sub>HgP</sub>= 90.5 Hz, <sup>2</sup>*J*<sub>SnP</sub>= 32.8). <sup>199</sup>Hg NMR (89.58, 25 °C) δ -701.87 (d, <sup>3</sup>*J*<sub>HgP</sub>= 90.5 Hz). <sup>119</sup>Sn NMR (186.50, 25 °C) δ 7.55 (d, <sup>2</sup>*J*<sub>SnP</sub>= 32.8). Calcd (%) for C<sub>25</sub>H<sub>30</sub>HgNO<sub>2</sub>PSn: C, 41.31; H, 4.16; N, 1.93. Found: C, 41.35; H, 4.11; N, 1.94.

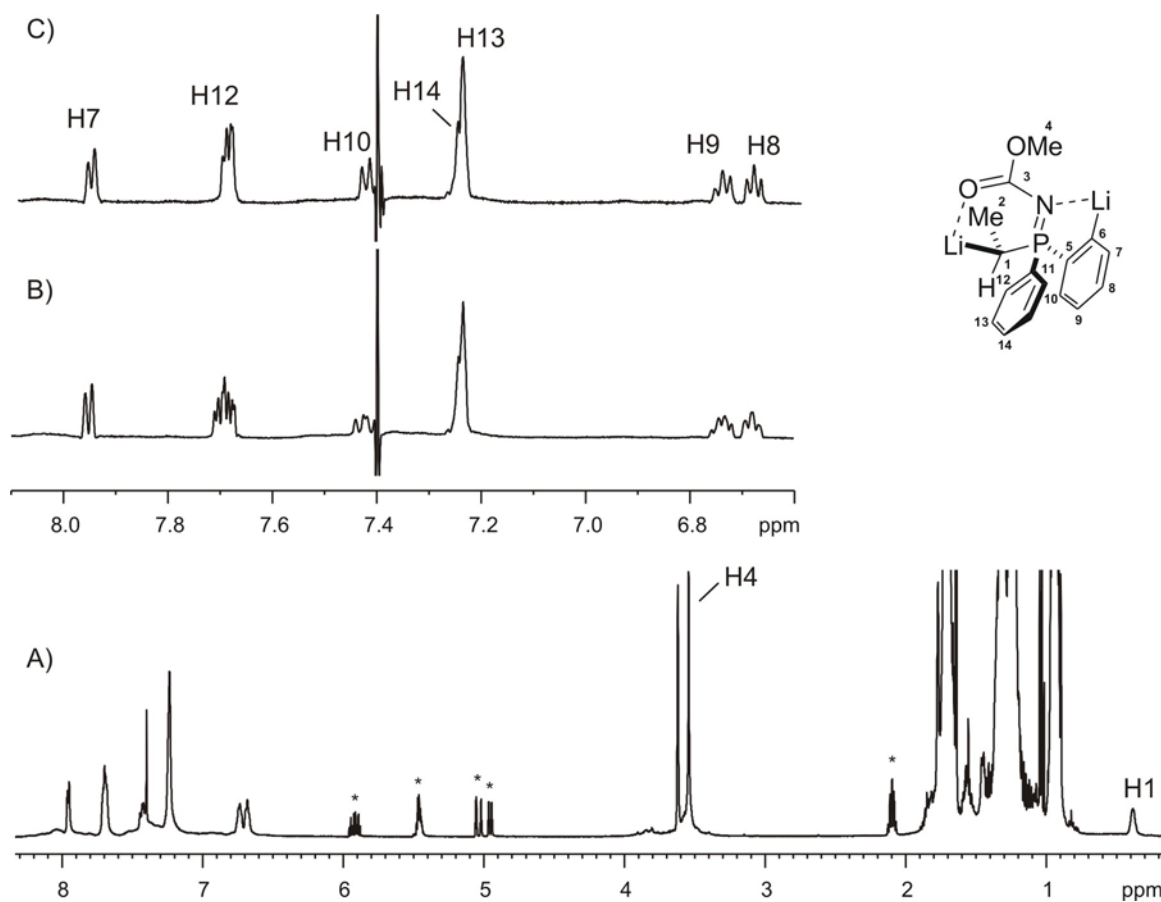

**Figure S1.**  $^1\text{H}$  NMR spectra (500.13 MHz) of **6** in  $\text{THF-}d_8$  measured at  $-90\text{ }^\circ\text{C}$ : (A) standard. (B) Expansion of the aromatic region of (A), processed with resolution enhancement (Gaussian,  $\text{LB} = -5$ ,  $\text{GB} = 0.1$ ). (C) The same as (B) with  $^{31}\text{P}$  decoupling. \*The olefinic proton signals and some of the signals appearing in the high field region correspond to impurities present in the *s*BuLi solution.<sup>2</sup>

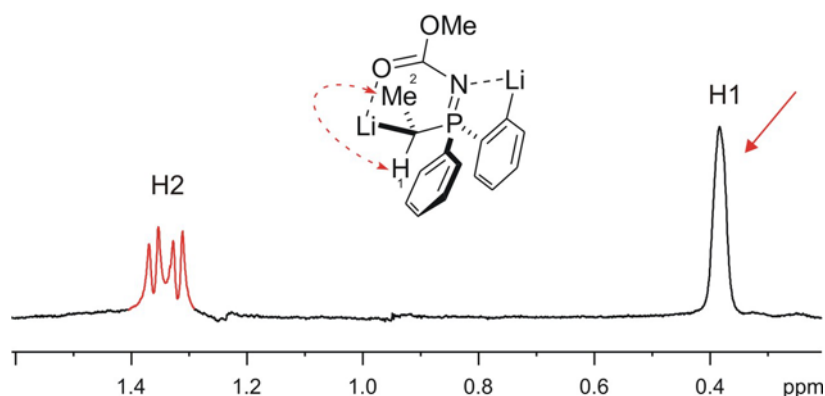

**Figure S2.** Expansion of the 1D gTOCSY of **6** in  $\text{THF-}d_8$  measured at  $-90\text{ }^\circ\text{C}$ . The arrow indicates the proton being selectively excited.

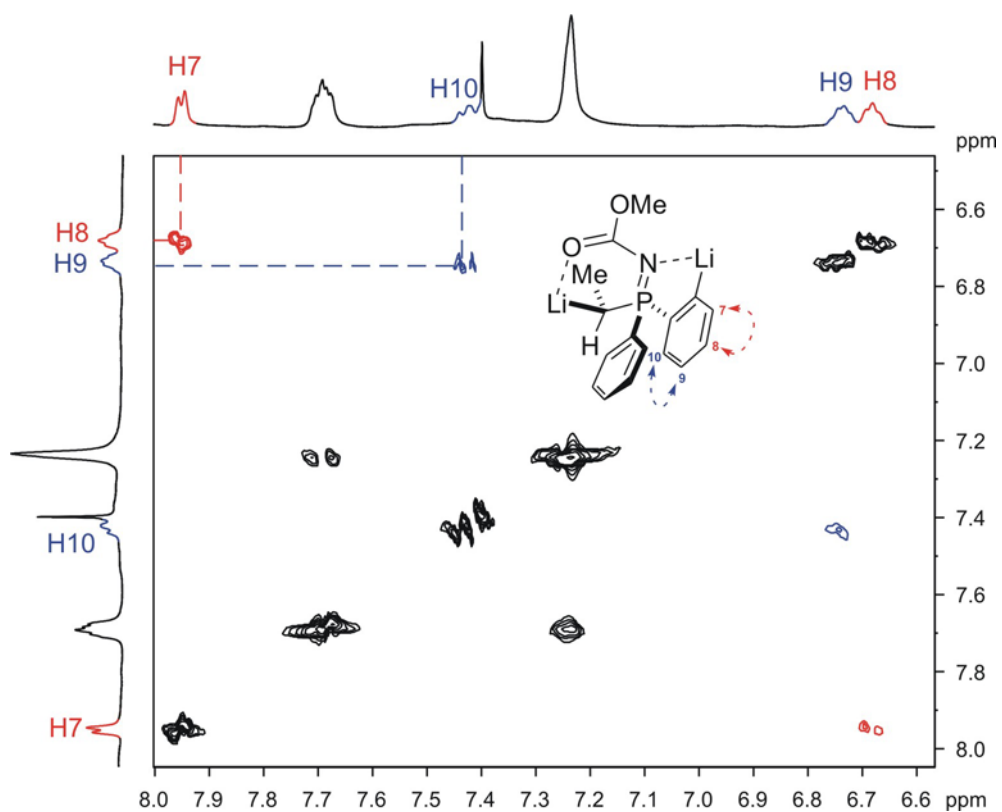

**Figure S3.** Expansion of the 2D gCOSY45 spectrum (500.13 MHz) of **6** in THF-*d*<sub>8</sub> measured at -95 °C. Only the aromatic region is shown.



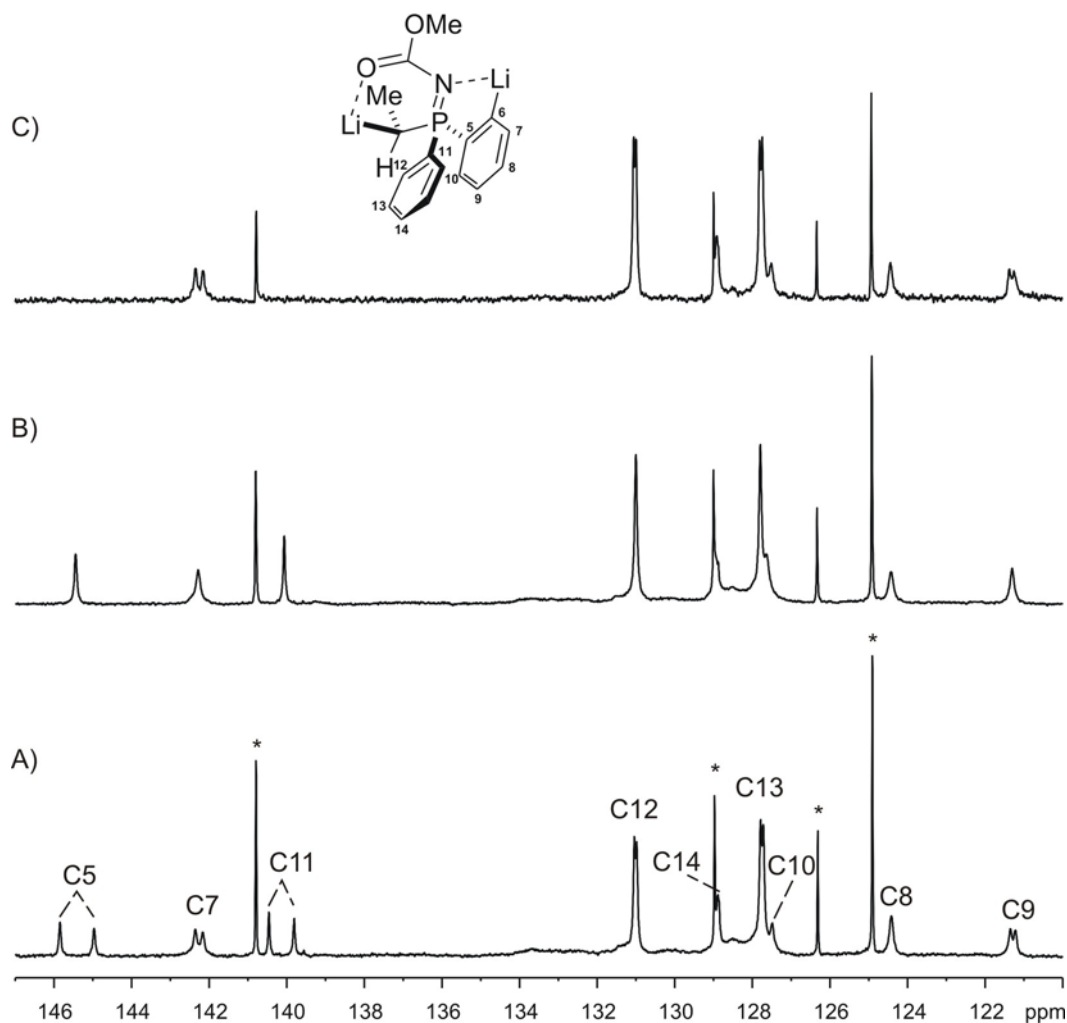

**Figure S4.** Aromatic region of the  $^{13}\text{C}$  NMR spectra (125.76 MHz) of **6** in  $\text{THF-}d_8$  measured at  $-95\text{ }^\circ\text{C}$ : (A)  $^{13}\text{C}\{^1\text{H}\}$ . (B)  $^{13}\text{C}\{^{31}\text{P}, ^1\text{H}\}$ . (C) DEPT135. \*Olefinic carbon signals are assigned to impurities present in the *s*BuLi solution.<sup>2</sup>

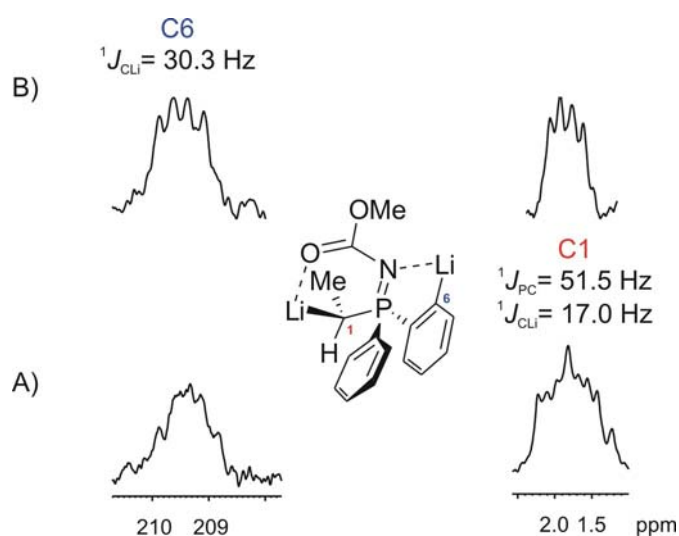

**Figure S5.** Expansions of the C1 and C6 carbon signals (125.76 MHz) of **6** measured at  $-95\text{ }^\circ\text{C}$ : (A)  $^{13}\text{C}\{^1\text{H}\}$  NMR spectrum. (B)  $^{13}\text{C}\{^{31}\text{P}, ^1\text{H}\}$  NMR spectrum.

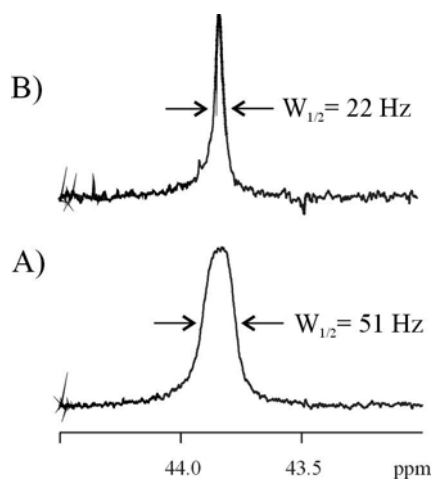

**Figure S6.**  $^{31}\text{P}\{^1\text{H}\}$  NMR spectra (202.46 MHz) of **6** measured at  $-100\text{ }^\circ\text{C}$  processed with exponential multiplication (LB: 2): (A) Standard. (B) With  $^7\text{Li}$  decoupling. The arrows indicate the line width at half height.

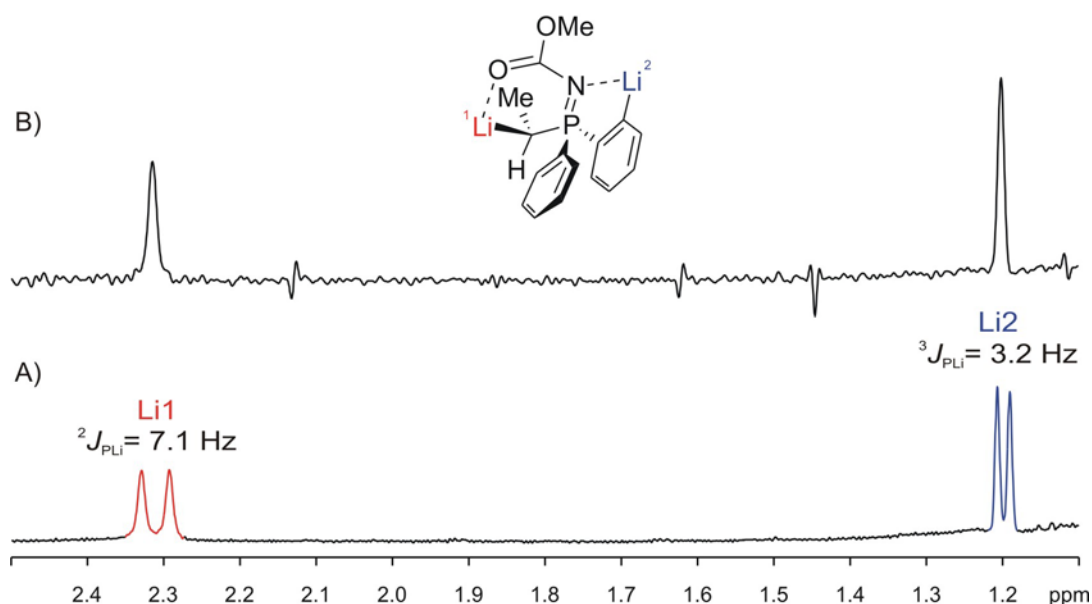

**Figure S7.**  $^7\text{Li}\{^1\text{H}\}$  NMR spectra (194.37 MHz) of **6** measured at  $-100\text{ }^\circ\text{C}$ : (A) standard, processed with resolution enhancement (Gaussian multiplication of the FID, LB: -2.5, GB: 0.1). (B) Acquired with  $^{31}\text{P}$  decoupling (Gaussian multiplication of the FID, LB: -2.5, GB: 0.3).

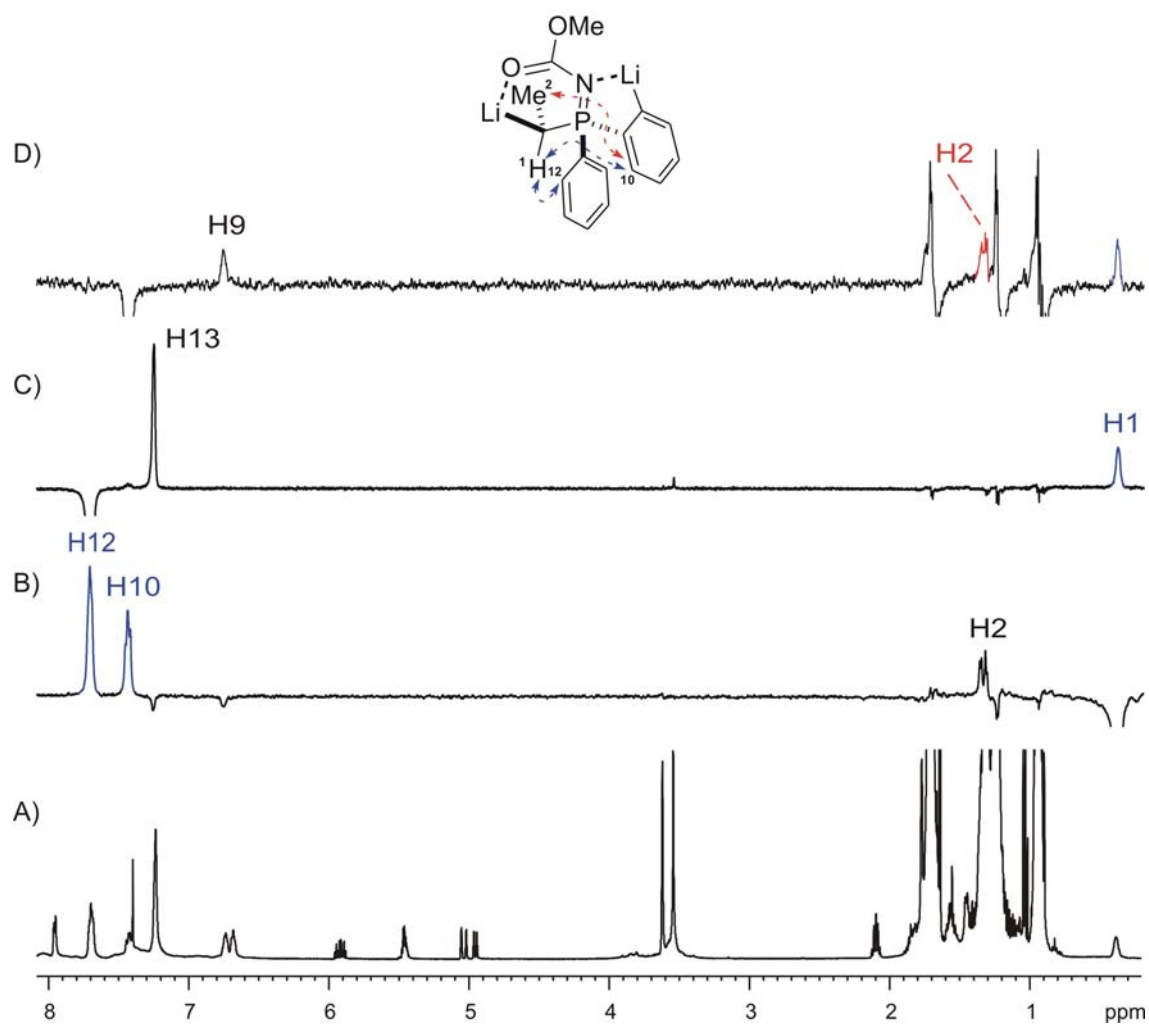

**Figure S8.** <sup>1</sup>H NMR spectra (500.13 MHz) of **6** in THF-*d*<sub>8</sub> measured at −90 °C: (A) reference. (B), (C), and (D) 1D gROESY, mixing time of 200 ms.

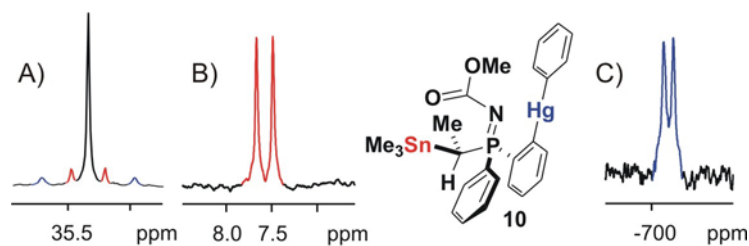

**Figure S9.** Selection NMR spectra of **10** in THF-*d*<sub>8</sub>: (A) <sup>31</sup>P{<sup>1</sup>H} NMR spectrum (121.49 MHz) of **10** in THF-*d*<sub>8</sub> (LB: 2). (B) <sup>119</sup>Sn, <sup>1</sup>H INEPT spectrum (186.50 MHz) of **10** in THF-*d*<sub>8</sub> (LB: 4). (C) <sup>199</sup>Hg{<sup>1</sup>H} NMR spectrum (89.58 MHz) of **10** in THF-*d*<sub>8</sub> (LB: 5).

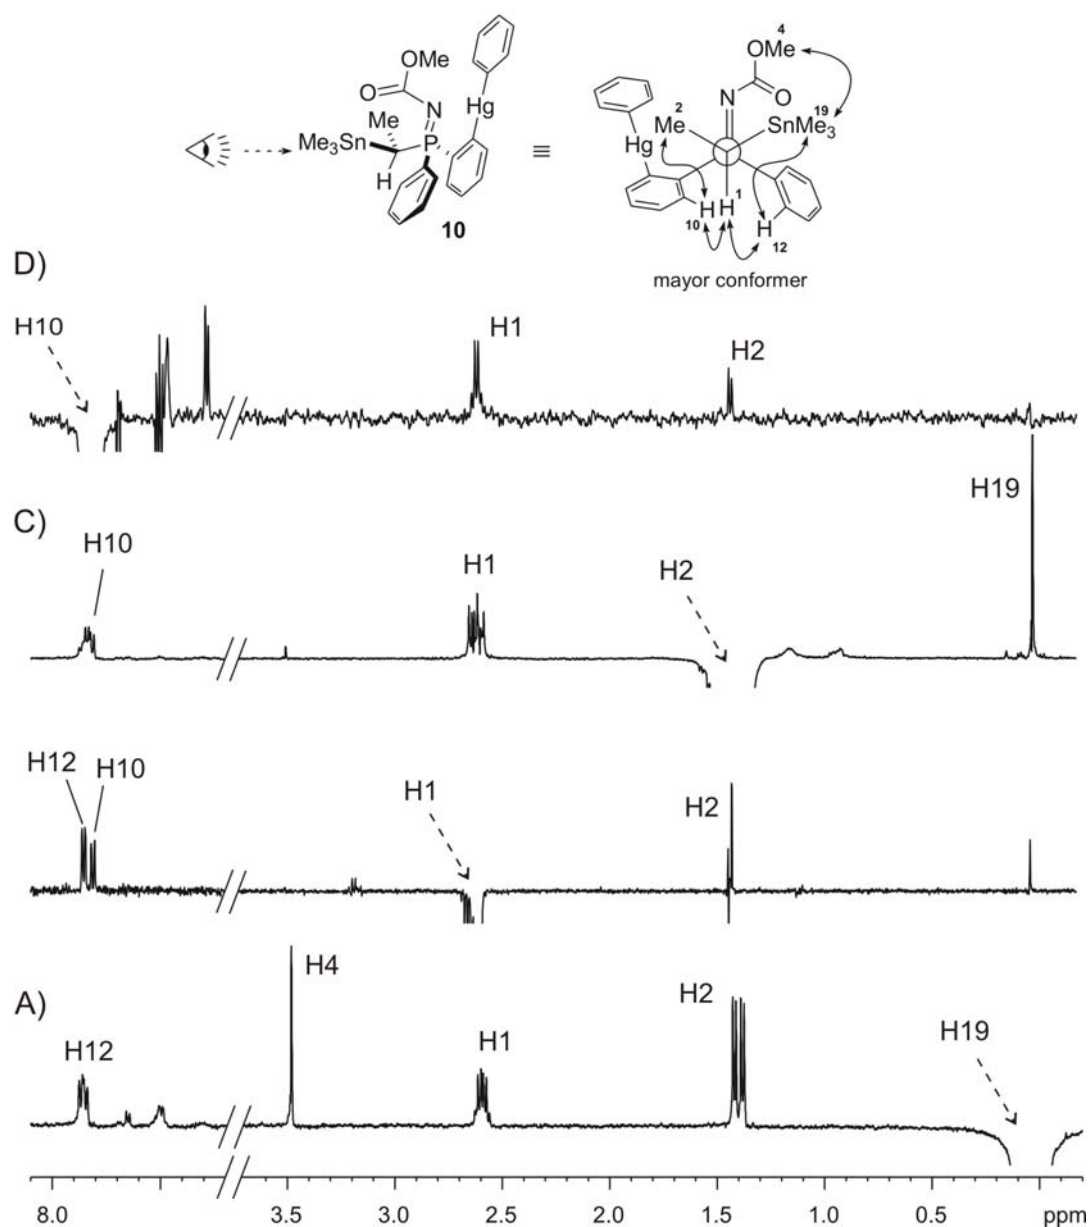

**Figure S10.** 1D gNOESY spectra (500.13 MHz) of **10** in THF-*d*<sub>8</sub>, mixing time of 500 ms: (A) and (C); (B) and (D) acquired with <sup>31</sup>P decoupling.
